# Supplementary material for: The Benefits of Librarian Leadership in University Teaching and Learning Centers: An Overview and Case Study
Source: Springer Nature journal article supplement (doi:10.1007/s10877-015-9777-5), 2004-01-01
Supplement: MOESM1 [file 8910648]

# Supplementary material 1

## Frequency Modulated Continuous Wave (FMCW) radar components scheme

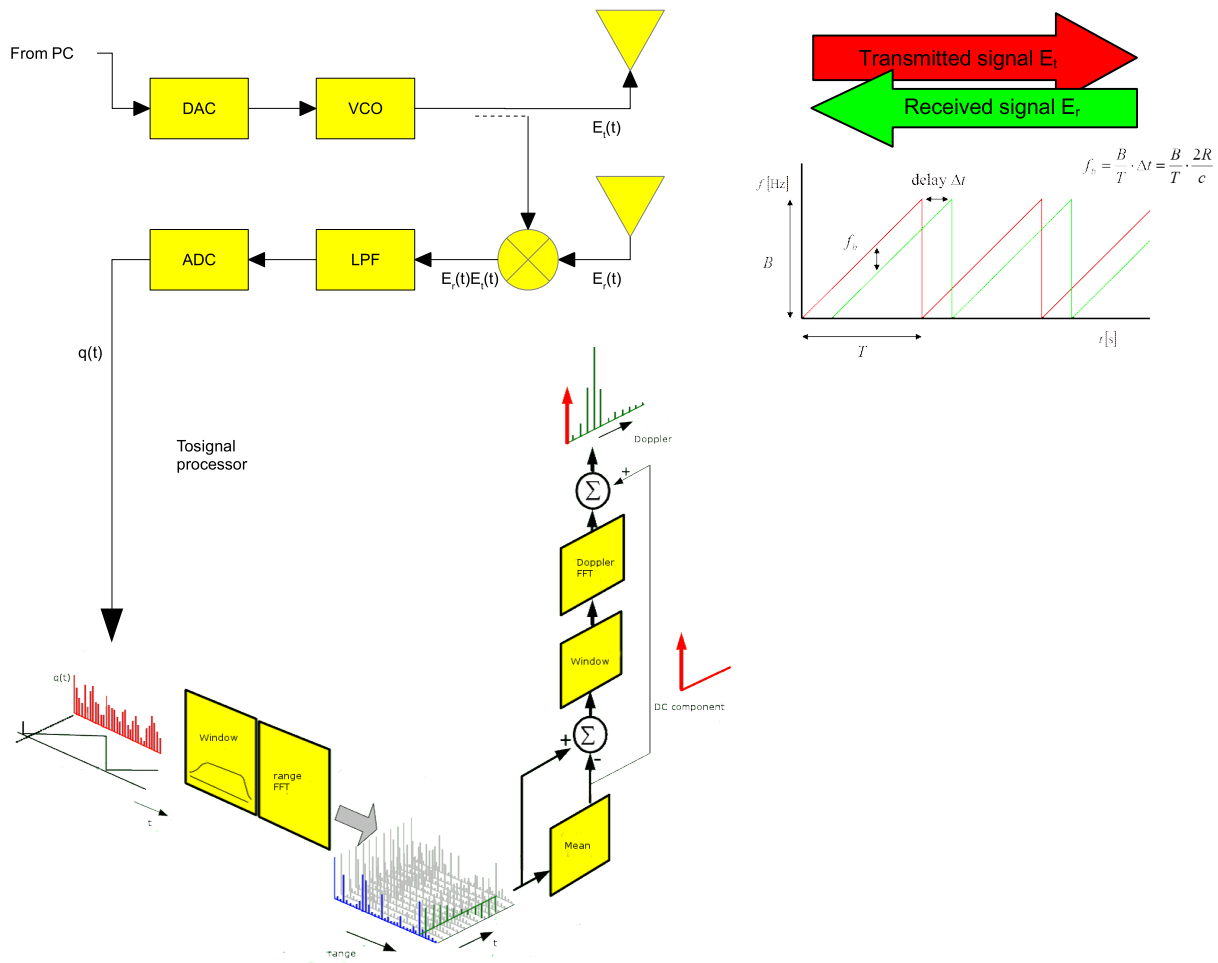

Journal: Journal of Clinical Monitoring and Computing

Authors: van Loon K, Breteler M.J.M., van Wolfwinkel L, Rheineck Leyssius A.T., Kossen S, Kalkman C.J., van Zaane B, Peelen L.M.

Affiliation: University Medical Center Utrecht

Email: K.vanLoon-3@umcutrecht.nl
