# Supplementary material for: The Benefits of Librarian Leadership in University Teaching and Learning Centers: An Overview and Case Study
Source: Springer Nature journal article supplement (doi:10.1007/s10877-015-9777-5), 2004-01-01

Supplementary material 2

Example of amplitude artifacts in several (6, 8, and 10) range bins for one patient (3).

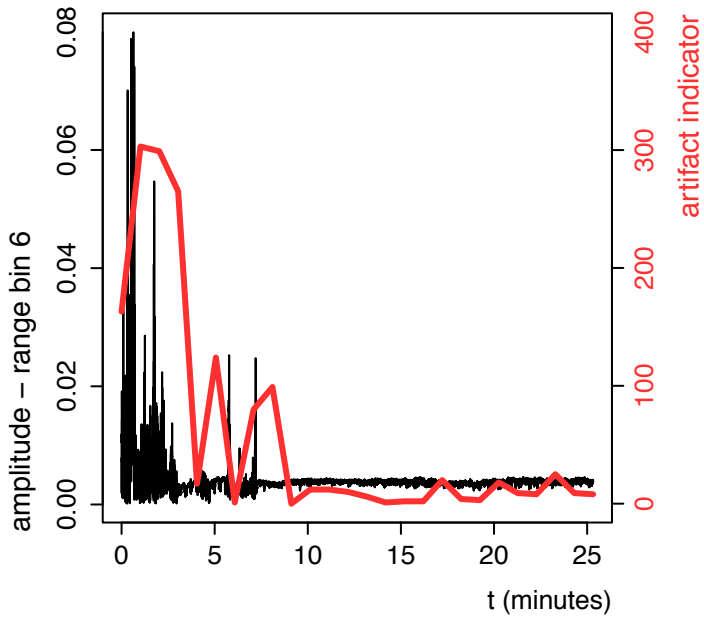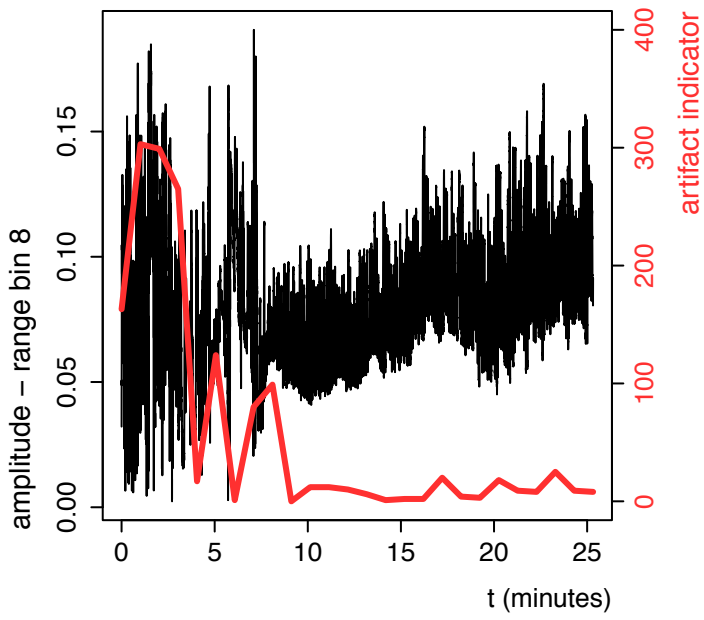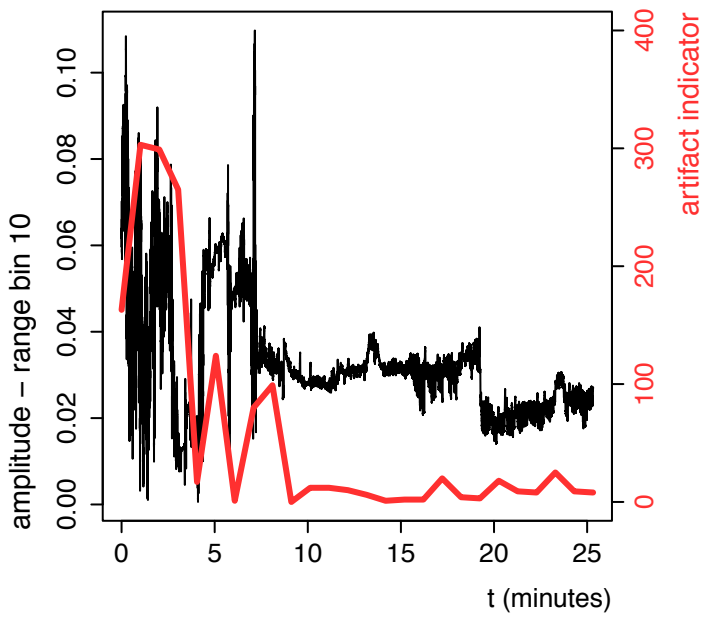

Supplement: MOESM2 [file 8910648]
