# Supplementary material for: The Benefits of Librarian Leadership in University Teaching and Learning Centers: An Overview and Case Study
Source: Springer Nature journal article supplement (doi:10.1007/s10877-015-9777-5), 2004-01-01

Supplementary material 3.

Distribution of data intervals for all patients within four datasets  
(MV = mechanical ventilation, SB = spontaneous breathing)

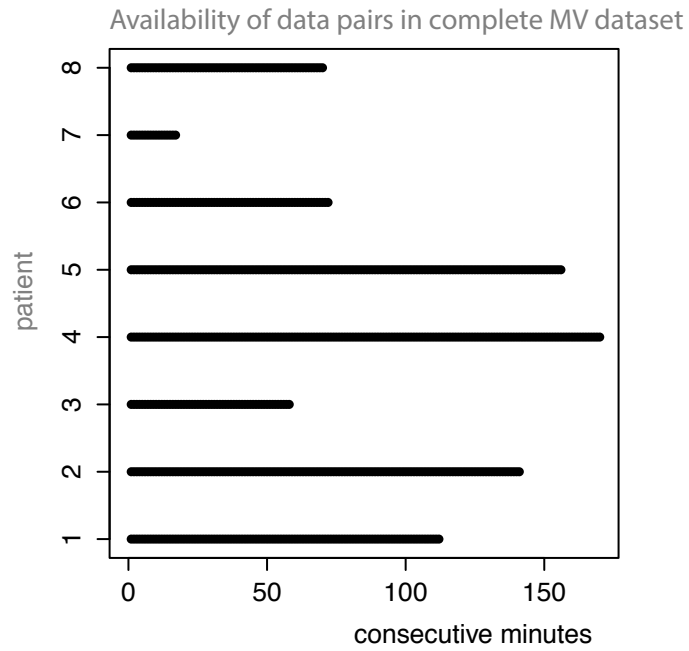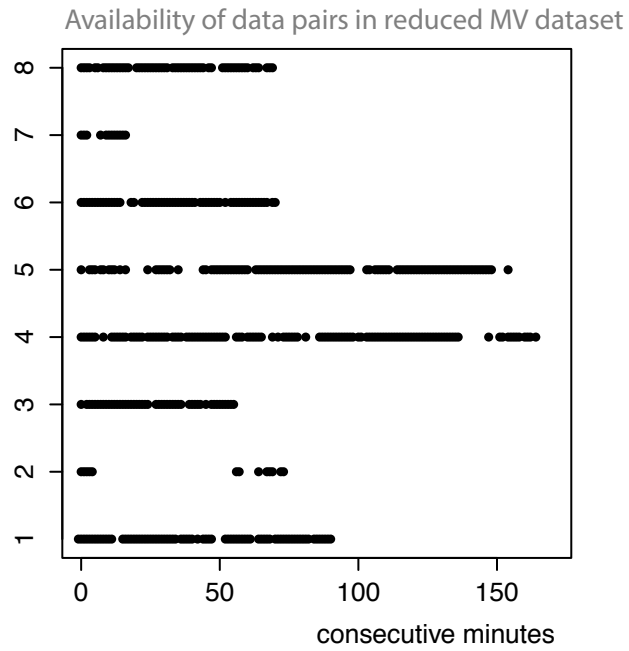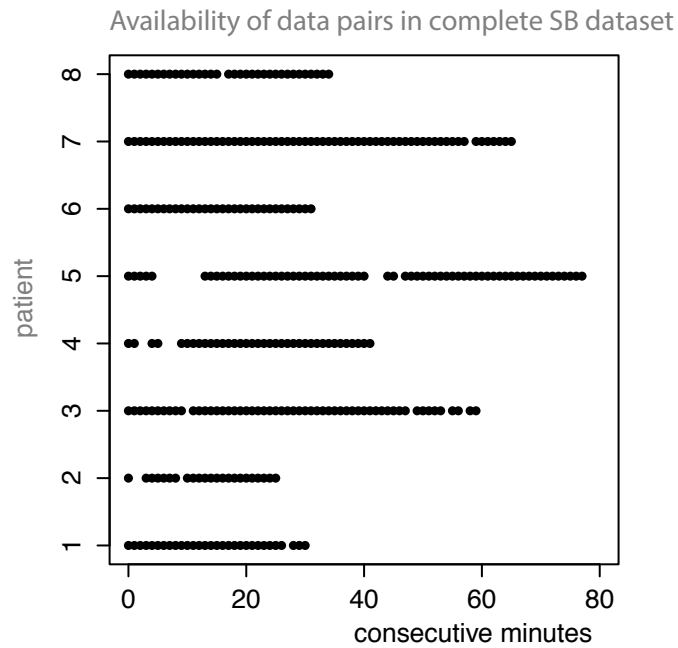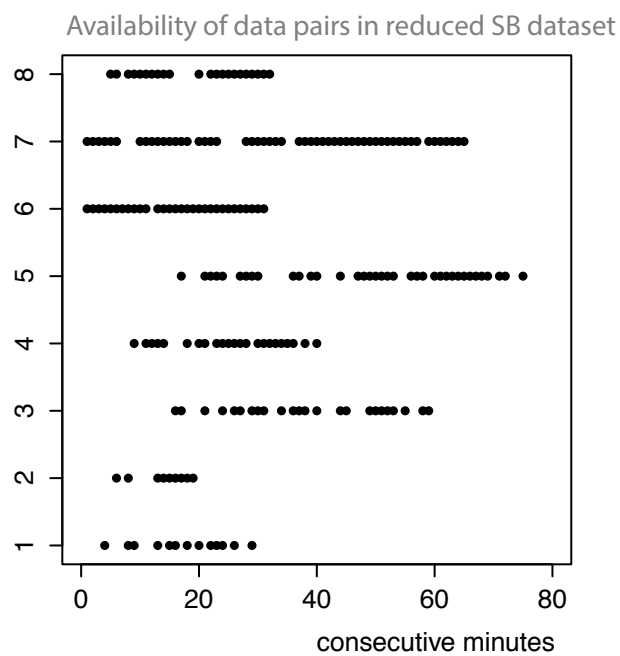

Supplement: MOESM3 [file 8910648]
